# The validity and reliability of parent's recall for routine Immunization in Cameroon: an evaluative study

**Martin Ndinakie Yakum<sup>1</sup>\*, Atanga Desmond Funwie<sup>1</sup>, Atem Bethel Ajong<sup>2</sup>, Zahir Shah<sup>1</sup>**

<sup>1</sup>Department of Epidemiology and Biostatistics, School of Medical and Health sciences, Kesmonds International University; <sup>2</sup>Department of Biochemistry, Faculty of Science, University of Dschang-Cameroon

\*Corresponding author: martinyakum@yahoo.com

**NOTE: This preprint reports new research that has not been certified by peer review and should not be used to guide clinical practice.**

## ABSTRACT

**Introduction:** In the absence of immunization documentations, parent's recall is used to assess children immunization status. During the 2018 demographic and health survey in Cameroon, parent's recall was the only source of information for 47% of children assessed for immunization coverage. The objective of this study was to determine the validity of parent's recall for immunization using the vaccination card as the reference in Yaounde-Cameroon.

**Methods:** The study targeting parents of children aged 0-59 months who had their children's vaccination cards. The immunization history of each child was taken based on both parent's recall and vaccination card. Using the vaccination card as a reference, the sensitivity, specificity, positive predictive value and negative predictive value of parent's recall were calculated. The degree of agreement and the kappa statistics between the two methods were calculated using R version 4.1.0 (2021-05-18).

**Results:** A total of 529 households were visited and 87 eligible parents enrolled. Approximately 55.2% of the children were girls and 53% of them were aged 12-59 months. In total, 94.25% of the participants enrolled were one of the biological parents of the children, with mothers making the majority 86.20% of participants. When combined for all vaccines in the EPI (i.e. one dose BCG, 4 doses of OPV, 3 doses of pentavalent vaccine, 3 doses of PCV-13, 2 doses of rotavirus vaccine, one dose of measles/rubella vaccine and one dose of the yellow fever vaccine), the sensitivity, specificity, positive predictive value, and negative predictive value of parent's recall were 63%, 60%, 90%, and 23% respectively. The degree of agreement between the two sources was highest for BCG(94%) and lowest with Polio2(32%). Parent's recall(94%) was most likely to correctly predict BCG vaccination status of a child than using the scars on the forearm(74%).

**Conclusion:** Our conclusion is that validity and reliability of parent's recall vary a lot across different vaccines and parent's recall is not very reliable for immunization status assessment in children. Parent's recall is preferred for verifying BCG immunization to scars on the forearm. In general, we recommend that parent's recall for routine immunization should be used only as a last resort or for BCG, and measles and Yellow Fever vaccines.

41     **Keywords:** vaccination-card, specificity, sensitivity, Positive-Predictive-Value, Negative-Predictive-Value,  
42                                    validity, reliability, parent’s recall

43

# 1. INTRODUCTION

Parent's recall for immunization can be defined as the ascertaining of children immunization history based solely on the parent's/guardian's declaration without any documented proof [1]. During immunization service delivery, the health provider checks the immunization history of the child and identifies vaccines that are due or missed with respect to the child's age. In the absence of any document to prove the real vaccination status of the child, the provider interviews the child's parents or guardians in order to determine the child's immunization status[2]. In the same way, researchers equally rely on parent's recall when the vaccination card is not available to evaluate the vaccination status of a child enrolled in survey [3].

The use of parent's recall as a source of information on children immunization varies across countries depending on organization and accessibility of immunization information system[4]. In Cameroon, investigators relied on parent's recall during immunization surveys for 30%-70% of children enrolled[5-8]. The case was different in other context, 3% in Tripura[9], 67% in Pakistan[8], 5% in Tanzania[10]. In Cameroon, immunization data are registered in paper-based registers, stored at the level of the health facility and individual vaccination cards, stored at the level of household[11]. However, the maintenance of the vaccination register is generally very poor and sometimes not updated[12,13].

Though parent's recall is used the last resort to assess the immunization status of children, it is known that data collected through parent's recall does not always match with the real immunization history of the child[14,15]. In the first place, the parent/guardian accompanying the child might not be the same person who was taking care of the child in the past. This can be the case if the biological parents of the child died at some point or unable to accompany the child because of occupations or illness[16]. Secondly, the parent's recall might be incorrect simply because the parent partially or fully forgot the immunization history of the child in question[17]. Lastly, because the investigator relies on parent's recall, the parent could intentionally decide to give incorrect information and there will be no way to verify[18].

A few number of studies have assessed the validity of parent's recall for immunization using vaccination card or vaccination register as the gold standard in some countries[4,16,19,20]. Based on the findings from these

69 studies, the specificity, sensitivity of parent 's recall for immunization varies across contexts and  
70 vaccines[15,16].

71 A systematic review on the validity of parent's recall observed that studies in the subject matter were very few  
72 in low-middle income countries(11%) where investigators rely very largely on household information for  
73 immunization history assessment[16]. The study concluded that there is no enough evidence to make a  
74 definitive conclusion on the subject[16]. No study has been done in Cameroon to assess the context specific  
75 situation. The objective of this study was to determine the validity of parent's recall for routine immunization in  
76 Cameroon using vaccination card as the reference.

77

78

## 2. MATERIALS AND METHODS

### 2.1. Ethical Approval

This study was authorized by the regional ethics committee for the center region of Cameroon with the authorization reference: No: 01410/CRERSHC/2021. All potential participants were well informed about the study objective and procedures of data collection by the study investigators. Before consenting, potential participants were given the chance to ask questions for clarifications and they were free to accept or refuse participation without any influence or consequence. Verbal informed consent was obtained from all participants before enrollment. The consent for children participants was obtained verbally from their parents after they were properly informed by the investigators. As explained to the participant during information process, participants who consented to participate were equally free to withdraw at anytime without having to explain their decision.

### 2.2. Research design

This was an evaluative study targeting parents of children aged 0-59months who had their children's routine vaccination cards. The immunization status of each child was recorded based on parent's recall and compared with the information from the vaccination card(reference sources) to estimate sensitivity, specificity, positive predictive value and negative predictive value of parent's recall. Data were collected through a household survey in which participants were interviewed and vaccination cards verified. However, with the acknowledgement that parent's recall is useful rather to the population subgroup without a vaccination card, we compared the parent's recall ability for BCG vaccine between children with cards and those without card, using BCG scars on the forearm as reference, for quality checks. The reliability of parent's recall was estimated using Kappa statistics and degree of agreement between the two sources of information. Data were analysed with R version 4.1.0 (2021-05-18).

### 2.3. Research area

This study was done in six(6) health districts in Cameroon: Biyem assi, Cite verte, Djoungolo, Efoulan, Nkolbisson, and Nkolndongo. The study area was Yaoundé Cameroon.

#### 2.4. Study population

This study targeted parents (or guardians) of children under five years, living in Yaounde that were in possession of their vaccination cards. All potential participants who could not present the vaccination card of their children were excluded from the analysis. However, participants without card were used for quality check analysis.

#### 2.5. Sample size calculation

Sample size needed for this study was calculated using the formula for sensitivity study[21]. The parameters used for the sample size estimation included the following: expected sensitivity of 93.4%[10],  $Z_{\alpha/2}$  at 95% confidence interval 1.96, expected vaccination coverage of 42%[3], and the desired precision of 9%. We obtained a sample size of 101 participants. When we considered the vaccination card retention in Cameroon (57%), average household size(4.9), and proportion of children under five years in the population[3], we estimated to interview 529 households in order to obtain the desired sample size.

#### 2.6. Sampling Methods

Household selection in the field was done using a 2-stage cluster sampling. A total of 30 clusters constituting of 24 households each were assessed. Clusters were selected with probability proportionate to population size (PPS) and households within cluster selected by restricted sampling. The restricted sampling here refers to a modified form of systematic sampling in which instead of using sampling interval in a systematic way, we randomly selected one household within successive sampling interval. The sampling interval in check cluster was slightly different depending on cluster size. A total of 24 households were selected and assessed in each cluster. This method was preferred to give more room for chance factor in household selection.

#### 2.7. Data collection

The data collection tool used in this survey was the questionnaire used by demographic health survey in Cameroon in 2018 for immunization coverage[3]. However, unlike DHS in which parent's recall was used in the absence of vaccination card, we used both sources at the same time for all participants. Data collection tool was

designed in KoBo toolbox and deployed in tablets for electronic data collection. Prior to data collection, data collectors were trained and tools pretested.

## 2.8. Data management and data analysis

Data analysis was done with R version 4.1.0 (2021-05-18). Using vaccination card as our reference source, we calculated sensitivity(se), specificity(se), positive predictive values (PPV) and negative predictive values (NPV) of parent's recall with their corresponding 95% confidence interval (CI). These values were calculated per vaccine dose and for the all EPI vaccines combined(i.e. one dose BCG, 4 doses of OPV, 3 doses of pentavalent vaccine, 3 doses of PCV-13, 2 doses of rotavirus vaccine, one dose of measles/rubella vaccine and one dose of the yellow fever vaccine). Besides, we calculated the degree of agreement between the 2 methods and the reliability of the test estimated using Kappa statistics. These values were also calculated per vaccine dose and for the all vaccine combined.

As a control check, we compared parent's recall ability for BCG vaccine between children with vaccination cards and children without cards. This was to evaluate if the recall ability between the two groups significantly differ, and hence would help in the interpretation of our findings.



### 3. Results

#### 3.1. Sample description

A total of 529 households were assessed and 304 children aged 0-59 months identified of which 87(24%) had their vaccination cards and 217(76%) without vaccination cards. Table1 presents the age and sex distribution of the children with card whose parents were enrolled and children without card, not enrolled into the study. Approximately 55.2% of the children with cards were girls and 47% of them were aged 0-11 months. In total, 82(94.25%) of the participants enrolled were one of the biological parents of the children with mothers making the majority 75(86.20%) of participants.

#### 3.2. parent's recall ability between children with cards and children without cards

Table 2 compares parent's recall for BCG vaccine in children with cards and children without cards, using BCG scars on the forearm as the reference. The results show that parent's recall ability does not significantly differ between children having their vaccination cards and children without vaccination card. This finding, suggest that though, our study is conducted in children with vaccination cards, our findings and conclusion can be applied to children without vaccination cards.

#### 3.3. validity of parent's recall

When combined for all EPI vaccine doses assessed, the sensitivity and specificity of parent's recall were 63% and 60% respectively. Also, the positive predictive value and negative predictive value were 90% and 23% respectively. However, the kappa test of agreement shows that parent's recall is not very reliable. Table 2 shows the number of times parent's recall was either in agreement or disagreement with the information from the vaccination cards. Note that though only 87 participants were enrolled, depending on the age of the child, one parent could answer up to 15 times on one child, corresponding to the different vaccine doses. This gives rise to the data in table 3 and hence table 4 which presents the validity and reliability parameters of parent's recall for all vaccines.

Table 4 presents the sensitivity, specificity, positive predictive value and negative predictive value of parents

recall with their corresponding 95% CIs calculated from the data in table 2. All EPI vaccines refers to one dose BCG, 4 doses of OPV, 3 doses of pentavalent vaccine, 3 doses of PCV-13, 2 doses of rotavirus vaccine, one dose of measles/rubella vaccine and one dose of the yellow fever vaccine

Table 5 shows the parameters of parent's recall validity and reliability for different vaccines. The validity and reliability parameters of parent's recall vary a lot across different vaccine doses. Our findings suggest that parent's recall is more sensitive and less specific for vaccines administered at birth (BCG and OPV0) and vaccines administered at 9 months (Measles and Yellow Fever). When checking the scars on the forearm for BCG compared to vaccination card, the results showed that parent's recall (d.a=94%) is more reliable than scars (d.a=74%) were very similar to that's of the parent's recall for BCG (see table 4). On the other hand, for vaccines administered within 6 weeks-14 weeks, parent's recall turns to be more specific and less sensitive as shown on table 5.

Parent's recall is generally having a good PPVs (77% -100%) and less NPVs (11%-80%) for all EPI vaccines except for OPV1, PCV-13 1, and rota1 that presented opposite findings. However, for MR and YF vaccines, the PPVs and NPVs were similar. In general, parent's recall was not very reliable with the kappa statistics  $\leq 5\%$  for all vaccines. However, parent's recall had a good degree of agreement ( $\geq 80\%$ ) for some vaccine doses such as BCG, OPV0, penta1, pcv-13 1 and YF vaccines.

## 4. Discussions

### 4.1. Summary findings

This study aims to assess the validity and reliability of parent's recall for routine immunization in children aged 0-59 months in Yaounde-Cameroon. Overall for all vaccines in the EPI (i.e. one dose BCG, 4 doses of OPV, 3 doses of pentavalent vaccine, 3 doses of PCV-13, 2 doses of rotavirus vaccine, one dose of measles/rubella vaccine and one dose of the yellow fever vaccine), the sensitivity, specificity, positive predictive value, and negative predictive value of parent's recall were 63%, 60%, 90%, and 23% respectively. The degree of agreement between the two sources was highest for BCG(94%) and lowest with Polio2(32%). Parent's recall(94%) was most likely to correctly predict BCG vaccination status of a child than using the scars on the forearm(74%).

### 4.2. Parent's recall validity

A few number of studies have assessed the validity of parent's recall for immunization using vaccination card or vaccination register as the gold standard in a limited number of countries[4,16,19,20]. Based on the findings from this studies, it can be observed that the specificity, sensitivity of parent 's recall for immunization various across vaccines[16]. This is similar with our findings as we observed that validity changes with vaccine.

A systematic review on the validity of parent's recall suggested that we do not yet have enough evidence to make a definitive conclusion on the subject[16]. On the other hand, another study in Tanzania suggested that sensitivity of parent's recall was very good(>93%) and more stable across different vaccines while specificity varies very widely across vaccines between 16%-95%[10]. However, this particular study in Tanzania included only children borne within 12 months to the survey meanwhile our study targeted children 0- 59 months. It could be explained by the fact that more than 50% of our participants were children aged 12-59 months giving more chance for the parents to have forgotten the vaccines received. In another study, it was observed that parents mostly report correctly the immunization status of children less than 6 months than older children[15]. We therefore expect our study to have more recall bias compared to this study in Tanzania. Several other studies have reported that parent's recall is not reliable for evaluating immunization status of children[15,22]. However,

studies have not attempted to describe the variability of this across vaccines. Because of recall's bias, relying on parent's recall, during routine service delivery exposes the child to the risk of missing some vaccines or being re-vaccinated unnecessarily[15,16].

Currently, parent's recall sometimes is the last resort and there is no other way to assess the vaccination status of the child especially in low income countries where the health information system is very weak[18,23]. There is therefore the need to improve the immunization information system in Cameroon. This is to reduce how much we rely on parent's recall which is less reliable.

### **4.3. study limitations**

Our study did not include children who could not present their vaccination cards. It should be noted that parent's recall is used solely in the absence of the vaccination card, because of this, the ideal study would be done rather in children without a card or at least include them. However, this required a reference data source that includes children without cards such as the health facility immunization registers. This was not possible in our context because of poor maintenance of immunization registers in the health facilities, which are often not up-to-date. For this reason, we decided to check the usefulness of our findings by investigating and comparing the parent's recall ability for BCG vaccine in children with cards and children without cards, using BCG scars on the forearm as the reference. It came out from this assessment that the parent's recall bias among children with cards was not significantly different from recall bias among children without cards. Therefore, parent's recall validity in this study are closely similar to the validity of parents recall in the entire population, including children without cards.

228

## CONCLUSIONS

229

230

231

232

The sensitivity, specificity, positive predictive value, and negative predictive value of parent's recall for routine immunization in Cameroon are respectively 63%, 60%, 90%, and 23%. Parent's recall varies from one vaccine to another and it is more sensitive and less specific for vaccines administered at birth (BCG and OPV0) and vaccines administered at 9 months (MR and YF).

233

234

235

236

When compared to checking the scars on the forearm for BCG, parent's recall was more reliable in evaluation BCG immunization in children with a recall bias of 6% against 27% for scars. Generally, parent's recall is not very reliable for assessing a child's immunization status. Based on these findings, we propose the following recommendations:

237

238

239

- Parent's recall for routine immunization should be used only in the absence of vaccination card. However, it could be used with less risk of recall bias if we have to assess only the immunization coverage in BCG, Measles, and Yellow Fever vaccines.

240

241

- To verify BCG immunization status of the child when the vaccination card is not available, we recommend to use parent's recall instead of scars on the forearm.

242

243

- Further research is needed to assess the other sources of information for routine immunization in Cameroon such as the vaccination register and vaccination card.

244

245  
246  
247  
248  
249  
250

**What is already know on this topic**

- Immunization data collected from parent’s recall is less reliable compared to data from vaccination cards and vaccination registers.
- Parent’s recall for routine immunization varies from one context to another.

251

**What this study adds**

252

- Validity of parent’s recall for every single routine immunization vaccine dose

253

- Compare parent’s recall bias between children with vaccination cards and those without cards

254

255

256

### Competing interests

257     The authors declare no competing interest.

258



259

## Authors' contributions

260 **MNY** conceived the study, designed the study, led data collection and analysis, write the first draft of  
261 thr manuscript; **ADF** conceived the study, contributed to study design and manuscript writing; **ABA**  
262 contributed to study design and writing of the manuscript; **ZS** conceived the study, contributed to  
263 study design and manuscript writing

264

265

## Acknowledgements

266 We are thankful to the data collection team: Miss DOUANLA KOUTIO Ingrid Marcelle, Miss  
267 TCHENGO MASSOM THÉRÈSE ZITA, Miss Christelle Bertyl TCHANA MBETBEUM, and Miss  
268 Ngueni Letegnou Nancy. Our appreciation equally goes to Professor Djuidje Marceline, providing  
269 training venue for data collectors training.

270

271  
272  
273  
274  
275  
276  
277  
278  
  
279  
  
280  
281  
282

---

**Tables**

- Table 1:** age and sex distribution of children whose parents were enrolled for parent’s recall study in Yaounde
- Table 2:** comparison of parent’s recall ability for BCG vaccine between children with cards and children without cards, using BCG scars as the reference
- Table 3:** data on immunization history of children obtained from parent’s recall and vaccination cards
- Table 4:** validity and reliability of parent’s recall for all EPI vaccines
- Table 5:** validity and reliability of parent’s recall for routine immunization of children per vaccine dose and BCG scars at the forearm using vaccination card as the gold standard.

283

LIST OF ABBREVIATIONS

| Abbreviation | Definition                                                                    |
|--------------|-------------------------------------------------------------------------------|
| BCG          | Calmette-Guérin Bacillus (vaccine)                                            |
| CI           | Confidence interval                                                           |
| DHS          | Demographic Health Survey                                                     |
| DPT-HepB+Hib | Diphtheria, Pertusis, Tetanus and Hepatitis B + Haemophilus Influenzae type b |
| EPI          | Expanded Program of Immunization                                              |
| Hib          | Haemophilus Influenzae type b                                                 |
| Hepb         | Hepatitis B vaccine                                                           |
| IPV          | Inactivated Polio Vaccine                                                     |
| Ka           | Kappa statistics                                                              |
| MR           | Measles and Rubella vaccine                                                   |
| NPV          | Negative predictive value                                                     |
| OR           | Odds ratio                                                                    |
| OPV          | Oral Polio Vaccine                                                            |
| PCV-13       | Pneumococcal Conjugate Vaccine 13                                             |
| Penta        | Diphtheria, Pertusis, Tetanus and Hepatitis B + Haemophilus Influenzae type b |
| PPV          | Positive predictive value                                                     |
| DPT+Hib+HepB | Diphtheria, Pertusis, Tetanus and Hepatitis B + Haemophilus Influenzae type b |
| d.a          | degree agreement                                                              |
| rota         | Rotavirus vaccine                                                             |
| Se           | Sensitivity                                                                   |
| Sp           | Specificity                                                                   |
| YF           | Yellow Fever                                                                  |

284

285

286

287

REFERENCES

288

289

290

291

292

293

294

295

296

297

298

299

300

301

302

303

304

305

306

307

308

309

310

311

312

313

314

315

316

317

318

319

- Wagner AL. The use and significance of vaccination cards. *Hum Vaccines Immunother* [Internet]. 2019 Jun 20 [cited 2021 Jun 13];15(12):2844–6. Available from: <https://www.ncbi.nlm.nih.gov/pmc/articles/PMC6930106/>
- Ministry Of Public Health. Norms and Standard: Expanded Programme on Immunisation Cameroon. Ministry Of Public Health; 2018.
- Statistique/INS IN de la, ICF. République du Cameroun Enquête Démographique et de Santé 2018. 2020 Feb 1 [cited 2021 Jun 27]; Available from: <https://dhsprogram.com/publications/publication-fr360-dhs-final-reports.cfm>
- Danovaro-Holliday MC, Dansereau E, Rhoda DA, Brown DW, Cutts FT, Gacic-Dobo M. Collecting and using reliable vaccination coverage survey estimates: Summary and recommendations from the “Meeting to share lessons learnt from the roll-out of the updated WHO Vaccination Coverage Cluster Survey Reference Manual and to set an operational research agenda around vaccination coverage surveys”, Geneva, 18–21 April 2017. *Vaccine*. 2018;36(34):5150–9.
- Ateudjieu J, Yakum MN, Goura AP, Tembei AM, Ingrid DK, Landry BB, et al. EPI immunization coverage, timeliness and dropout rate among children in a West Cameroon health district: a cross sectional study. *BMC Public Health*. 2020;20(1):1–11.
- Mavimbe JC, Braa J, Bjune G. Assessing immunization data quality from routine reports in Mozambique. *BMC Public Health*. 2005;5(1):1–8.
- Russo G, Miglietta A, Pezzotti P, Biguioh RM, Mayaka GB, Sobze MS, et al. Vaccine coverage and determinants of incomplete vaccination in children aged 12–23 months in Dschang, West Region, Cameroon: a cross-sectional survey during a polio outbreak. *BMC Public Health*. 2015;15(1):1–11.
- Sheikh SS, Ali SA. Predictors of vaccination card retention in children 12-59 months old in Karachi, Pakistan. *Oman Med J*. 2014;29(3):190.
- Datta et al. - 2016 - A Study to Assess the Prevalence of Vaccination Ca.pdf [Internet]. [cited 2021 Jun 13]. Available from: <http://www.iosrjournals.org/iosr-jdms/papers/Vol15-Issue%209/Version-1/E1509012225.pdf>
- Binyaruka P, Borghi J. Validity of parental recalls to estimate vaccination coverage: evidence from Tanzania. *BMC Health Serv Res*. 2018;18(1):1–9.
- Ministry Of Public Health. NORMES ET STANDARDS DU PROGRAMME ELARGI DE VACCINATION DU CAMEROUN [Internet]. 2009 [cited 2021 Jun 27]. Available from:

320 [https://docplayer.fr/7296942-Normes-et-standards-du-programme-elargi-de-vaccination-du-](https://docplayer.fr/7296942-Normes-et-standards-du-programme-elargi-de-vaccination-du-cameroun.html)  
321 [cameroun.html](https://docplayer.fr/7296942-Normes-et-standards-du-programme-elargi-de-vaccination-du-cameroun.html)

322 12. Pefura Yone EW, Kengne AP, Kuaban C. Incidence, time and determinants of tuberculosis  
323 treatment default in Yaounde, Cameroon: a retrospective hospital register-based cohort study.  
324 BMJ Open [Internet]. 2011 Nov 24 [cited 2022 Jun 25];1(2):e000289–e000289. Available from:  
325 <https://bmjopen.bmj.com/lookup/doi/10.1136/bmjopen-2011-000289>

326 13. Juillard C, Kouo Ngamby M, Ekeke Monono M, Etoundi Mballa GA, Dicker RA, Stevens KA,  
327 et al. Exploring data sources for road traffic injury in Cameroon: Collection and completeness of  
328 police records, newspaper reports, and a hospital trauma registry. Surgery [Internet]. 2017 Dec 1  
329 [cited 2022 Jun 25];162(6, Supplement):S24–31. Available from:  
330 <https://www.sciencedirect.com/science/article/pii/S0039606017300910>

331 14. Omoleke SA, Tadesse MG. A pilot study of routine immunization data quality in Bunza Local  
332 Government area: causes and possible remedies. Pan Afr Med J. 2017;27.

333 15. Valadez JJ, Weld LH. Maternal recall error of child vaccination status in a developing nation.  
334 Am J Public Health [Internet]. 1992 Jan 1 [cited 2022 Jan 9];82(1):120–2. Available from:  
335 <https://ajph.aphapublications.org/doi/abs/10.2105/AJPH.82.1.120>

336 16. Miles M, Ryman TK, Dietz V, Zell E, Luman ET. Validity of vaccination cards and parental  
337 recall to estimate vaccination coverage: a systematic review of the literature. Vaccine.  
338 2013;31(12):1560–8.

339 17. Imran H, Raja D, Grassly NC, Wadood MZ, Safdar RM, O'Reilly KM. Routine immunization in  
340 Pakistan: comparison of multiple data sources and identification of factors associated with  
341 vaccination. Int Health. 2018;10(2):84–91.

342 18. Akhlaq A, McKinsty B, Muhammad KB, Sheikh A. Barriers and facilitators to health  
343 information exchange in low- and middle-income country settings: a systematic review. Health  
344 Policy Plan [Internet]. 2016 Nov 1 [cited 2022 Jan 18];31(9):1310–25. Available from:  
345 <https://doi.org/10.1093/heapol/czw056>

346 19. Dorell CG, Jain N, Yankey D. Validity of parent-reported vaccination status for adolescents aged  
347 13–17 years: National Immunization Survey-Teen, 2008. Public Health Rep.  
348 2011;126(2\_suppl):60–9.

349 20. Suarez L, Simpson DM, Smith DR. Errors and Correlates in Parental Recall of Child  
350 Immunizations: Effects on Vaccination Coverage Estimates. Pediatrics [Internet]. 1997 May 1  
351 [cited 2022 Jan 9];99(5):e3. Available from: <https://doi.org/10.1542/peds.99.5.e3>

352 21. Hajian-Tilaki K. Sample size estimation in diagnostic test studies of biomedical informatics. J  
353 Biomed Inform. 2014 Apr;48:193–204.

22. Hu Y, Liang H, Chen F, Shen L, Pan X, Wang Y, et al. Evaluating the vaccination coverage: validity of household-held vaccination booklet and caregiver's recall. *Hum Vaccines Immunother* [Internet]. 2021 Sep 2 [cited 2022 Jan 18];17(9):3034–41. Available from: <https://doi.org/10.1080/21645515.2021.1906151>
23. Mutale W, Chintu N, Amoroso C, Awoonor-Williams K, Phillips J, Baynes C, et al. Improving health information systems for decision making across five sub-Saharan African countries: Implementation strategies from the African Health Initiative. *BMC Health Serv Res* [Internet]. 2013 May 31 [cited 2022 Jan 18];13(2):S9. Available from: <https://doi.org/10.1186/1472-6963-13-S2-S9>

| <b>Table 1:</b> age and sex distribution of children whose parents were enrolled for parent's recall study in Yaounde |                                 |                     |                     |                   |                                    |                         |                         |                   |
|-----------------------------------------------------------------------------------------------------------------------|---------------------------------|---------------------|---------------------|-------------------|------------------------------------|-------------------------|-------------------------|-------------------|
|                                                                                                                       | Children with vaccination cards |                     |                     |                   | Children without vaccination cards |                         |                         |                   |
|                                                                                                                       | 0-11months<br>n(%)              | 12-23months<br>n(%) | 23-59months<br>n(%) | Total_sex<br>n(%) | 0-<br>11months<br>n(%)             | 12-<br>23months<br>n(%) | 23-<br>59months<br>n(%) | Total_sex<br>n(%) |
| <b>Boys</b>                                                                                                           | 23(56.1)                        | 9(36.0)             | 7(33.3)             | 39(44.8)          | 20(57.1)                           | 17(35.4)                | 76(56.7)                | 113(44.8)         |
| <b>Girls</b>                                                                                                          | 18(43.9)                        | 16(64.0)            | 14(66.7)            | 48(55.2)          | 15(42.9)                           | 31(64.6)                | 58(43.3)                | 104(55.2)         |
| <b>Total_age</b>                                                                                                      | 41(47.1)                        | 25(28.7)            | 21(24.1)            | 87(100.0)         | 35(16.2)                           | 48(22.1)                | 134(61.7)               | 217(100.0)        |

**Table 2:** comparison of parent's recall ability for BCG vaccine between children with cards and children without cards, using BCG scars as the reference

|                                   | Children with cards | Children without cards | p-value |
|-----------------------------------|---------------------|------------------------|---------|
| Sensitivity                       | 0.77(0.66, 0.85)    | 0.92(0.87,0.95)        | 0.8993  |
| Specificity                       | 0.40(0.05, 0.85)    | 0.31(0.11, 0.59)       | 0.9026  |
| positive predictive value         | 0.95(0.87, 0.99)    | 0.94(0.90, 0.97)       | 0.9935  |
| negative predictive value         | 0.10(0.01, 0.30)    | 0.24(0.08, 0.47)       | 0.8052  |
| correct classification proportion | 0.75(0.64, 0.83)    | 0.88(0.82, 0.92)       | 0.9109  |

**Table 3:** data on immunization history of children obtained from parent's recall and vaccination cards

|                 |             | Vaccination card |             |       |
|-----------------|-------------|------------------|-------------|-------|
|                 |             | Immunized        | Unimmunized | Total |
| Parent's recall | Immunized   | 570              | 66          | 636   |
|                 | Unimmunized | 337              | 101         | 438   |
|                 | Total       | 907              | 167         | 1074  |

**Table 4:** validity and reliability of parent's recall for all EPI vaccines

| Parameter                      | Value | 95%CI        |
|--------------------------------|-------|--------------|
| Sensitivity (Se)               | 0.63  | [0.60, 0.66] |
| Specificity(Sp)                | 0.60  | [0.53, 0.68] |
| Positive Predictive value(PPV) | 0.90  | [0.87, 0.92] |
| Negative Predictive Value(NPV) | 0.23  | [0.19, 0.27] |
| Degree of agreement (d.a)      | 0.62  | [0.60, 0.65] |
| Kappa statistics               | 0.14  | [0.09, 0.19] |

**Table 5:** validity and reliability of parent's recall for routine immunization of children per vaccine dose and BCG scars at the forearm using vaccination card as the gold standard.



| <b>Vaccine</b>  | Sensitivity(PPV)  | Specificity(NPV)  | PPV(Sp)           | NPV(Se)           | d.a  | Ka   |
|-----------------|-------------------|-------------------|-------------------|-------------------|------|------|
| <b>BCG</b>      | 0.98 (0.91, 1.00) | 0.50 (0.12, 0.88) | 0.96 (0.90, 0.99) | 0.60 (0.15, 0.95) | 0.94 | 0.51 |
| <b>Polio0</b>   | 0.91 (0.83, 0.96) | 0.43 (0.10, 0.82) | 0.95 (0.87, 0.99) | 0.30 (0.07, 0.65) | 0.87 | 0.28 |
| <b>Polio1</b>   | 1.00 (0.84, 1.00) | 0.11 (0.04, 0.21) | 0.26 (0.17, 0.37) | 1.00 (0.59, 1.00) | 0.32 | 0.05 |
| <b>Penta1</b>   | 0.93 (0.84, 0.98) | 0.62 (0.24, 0.91) | 0.96 (0.87, 0.99) | 0.50 (0.19, 0.81) | 0.90 | 0.50 |
| <b>PCV-13 1</b> | 0.46 (0.19, 0.75) | 0.89 (0.79, 0.95) | 0.46 (0.19, 0.75) | 0.89 (0.79, 0.95) | 0.82 | 0.35 |
| <b>Rota1</b>    | 0.43 (0.18, 0.71) | 0.83 (0.71, 0.91) | 0.35 (0.14, 0.62) | 0.87 (0.75, 0.94) | 0.75 | 0.23 |
| <b>Polio2</b>   | 0.25 (0.15, 0.38) | 1.00 (0.54, 1.00) | 1.00 (0.79, 1.00) | 0.11 (0.04, 0.23) | 0.32 | 0.06 |
| <b>Penta2</b>   | 0.43 (0.30, 0.56) | 1.00 (0.54, 1.00) | 1.00 (0.87, 1.00) | 0.14 (0.05, 0.29) | 0.48 | 0.11 |
| <b>PCV-13 2</b> | 0.32 (0.20, 0.45) | 0.83 (0.52, 0.98) | 0.90 (0.68, 0.99) | 0.20 (0.10, 0.34) | 0.41 | 0.07 |
| <b>Rota2</b>    | 0.64 (0.50, 0.76) | 0.43 (0.18, 0.71) | 0.81 (0.67, 0.92) | 0.23 (0.09, 0.44) | 0.59 | 0.05 |
| <b>Polio3</b>   | 0.28 (0.16, 0.42) | 0.92 (0.62, 1.00) | 0.94 (0.70, 1.00) | 0.22 (0.12, 0.36) | 0.39 | 0.09 |
| <b>Penta3</b>   | 0.42 (0.29, 0.56) | 0.73 (0.39, 0.94) | 0.88 (0.70, 0.98) | 0.20 (0.09, 0.36) | 0.47 | 0.07 |
| <b>PCV-13 3</b> | 0.40 (0.27, 0.55) | 0.64 (0.35, 0.87) | 0.81 (0.61, 0.93) | 0.22 (0.11, 0.38) | 0.45 | 0.03 |
| <b>MR</b>       | 0.92 (0.78, 0.98) | 0.41 (0.18, 0.67) | 0.77 (0.62, 0.89) | 0.70 (0.35, 0.93) | 0.76 | 0.37 |
| <b>YF</b>       | 0.95 (0.82, 0.99) | 0.47 (0.23, 0.72) | 0.80 (0.65,       | 0.80 (0.44,       | 0.80 | 0.47 |

|                                                                                                                                                                        |                   |                   |             |             |      |      |
|------------------------------------------------------------------------------------------------------------------------------------------------------------------------|-------------------|-------------------|-------------|-------------|------|------|
|                                                                                                                                                                        |                   |                   | 0.90)       | 0.97)       |      |      |
| <b>BCG Scars</b>                                                                                                                                                       | 0.77 (0.66, 0.85) | 0.33 (0.04, 0.78) | 0.94 (0.85, | 0.10 (0.01, | 0.74 | 0.05 |
|                                                                                                                                                                        |                   |                   | 0.98)       | 0.30)       |      |      |
| <i>PPV= positive predictive value, NPV= Negative predictive value, d. a = Proportion of agreement between the two methods and ka = Kappa constant for reliability.</i> |                   |                   |             |             |      |      |

**Attachment: STROBE Statement—Checklist of items that should be included in reports of cross-sectional studies**

|                              | Item No | Recommendation                                                                                                                                                                                               | Page No |
|------------------------------|---------|--------------------------------------------------------------------------------------------------------------------------------------------------------------------------------------------------------------|---------|
| Title and abstract           | 1       | (a) Indicate the study's design with a commonly used term in the title or the abstract                                                                                                                       | 1       |
|                              |         | (b) Provide in the abstract an informative and balanced summary of what was done and what was found                                                                                                          | 2       |
| Introduction                 |         |                                                                                                                                                                                                              |         |
| Background/rationale         | 2       | Explain the scientific background and rationale for the investigation being reported                                                                                                                         | 4       |
| Objectives                   | 3       | State specific objectives, including any prespecified hypotheses                                                                                                                                             | 5       |
| Methods                      |         |                                                                                                                                                                                                              |         |
| Study design                 | 4       | Present key elements of study design early in the paper                                                                                                                                                      | 6       |
| Setting                      | 5       | Describe the setting, locations, and relevant dates, including periods of recruitment, exposure, follow-up, and data collection                                                                              | 6       |
| Participants                 | 6       | (a) Give the eligibility criteria, and the sources and methods of selection of participants                                                                                                                  | 7       |
| Variables                    | 7       | Clearly define all outcomes, exposures, predictors, potential confounders, and effect modifiers. Give diagnostic criteria, if applicable                                                                     | 8       |
| Data sources/<br>measurement | 8*      | For each variable of interest, give sources of data and details of methods of assessment (measurement). Describe comparability of assessment methods if there is more than one group                         | 7       |
| Bias                         | 9       | Describe any efforts to address potential sources of bias                                                                                                                                                    | 8       |
| Study size                   | 10      | Explain how the study size was arrived at                                                                                                                                                                    | 7       |
| Quantitative variables       | 11      | Explain how quantitative variables were handled in the analyses. If applicable, describe which groupings were chosen and why                                                                                 | 8       |
| Statistical methods          | 12      | (a) Describe all statistical methods, including those used to control for confounding                                                                                                                        | 8       |
|                              |         | (b) Describe any methods used to examine subgroups and interactions                                                                                                                                          | 8       |
|                              |         | (c) Explain how missing data were addressed                                                                                                                                                                  | 8       |
|                              |         | (d) If applicable, describe analytical methods taking account of sampling strategy                                                                                                                           | 7       |
|                              |         | (e) Describe any sensitivity analyses                                                                                                                                                                        | 8       |
| Results                      |         |                                                                                                                                                                                                              |         |
| Participants                 | 13*     | (a) Report numbers of individuals at each stage of study—eg numbers potentially eligible, examined for eligibility, confirmed eligible, included in the study, completing follow-up, and analysed            | 9       |
|                              |         | (b) Give reasons for non-participation at each stage                                                                                                                                                         | 9       |
|                              |         | (c) Consider use of a flow diagram                                                                                                                                                                           |         |
| Descriptive data             | 14*     | (a) Give characteristics of study participants (eg demographic, clinical, social) and information on exposures and potential confounders                                                                     | 9       |
|                              |         | (b) Indicate number of participants with missing data for each variable of interest                                                                                                                          | 9       |
| Outcome data                 | 15*     | Report numbers of outcome events or summary measures                                                                                                                                                         | 10      |
| Main results                 | 16      | (a) Give unadjusted estimates and, if applicable, confounder-adjusted estimates and their precision (eg, 95% confidence interval). Make clear which confounders were adjusted for and why they were included | 10      |
|                              |         | (b) Report category boundaries when continuous variables were                                                                                                                                                | 10      |

|                          |    |                                                                                                                                                                            |      |
|--------------------------|----|----------------------------------------------------------------------------------------------------------------------------------------------------------------------------|------|
|                          |    | categorized                                                                                                                                                                |      |
|                          |    | (c) If relevant, consider translating estimates of relative risk into absolute risk for a meaningful time period                                                           |      |
| Other analyses           | 17 | Report other analyses done—eg analyses of subgroups and interactions, and sensitivity analyses                                                                             | 10   |
| <b>Discussion</b>        |    |                                                                                                                                                                            |      |
| Key results              | 18 | Summarise key results with reference to study objectives                                                                                                                   | 10   |
| Limitations              | 19 | Discuss limitations of the study, taking into account sources of potential bias or imprecision. Discuss both direction and magnitude of any potential bias                 | 11   |
| Interpretation           | 20 | Give a cautious overall interpretation of results considering objectives, limitations, multiplicity of analyses, results from similar studies, and other relevant evidence | 9-10 |
| Generalisability         | 21 | Discuss the generalisability (external validity) of the study results                                                                                                      | 11   |
| <b>Other information</b> |    |                                                                                                                                                                            |      |
| Funding                  | 22 | Give the source of funding and the role of the funders for the present study and, if applicable, for the original study on which the present article is based              |      |
